# Supplementary material for: Long-Branch Attraction Bias and Inconsistency in Bayesian Phylogenetics
Source: PLOS journal article supplement (doi:10.1371/journal.pone.0007891), 2009-12-09
Supplement: S1 (10.1371/journal.pone.0007891.s001) [file journal.pone.0007891.s001]

| Figure 1 Panel | BI    | ML    | ratio(BI/ML) |
|----------------|-------|-------|--------------|
| a              | 0.020 | 0.016 | 1.25         |
| b              | 0.027 | 0.021 | 1.27         |
| c              | 0.024 | 0.018 | 1.38         |
| d              | 0.038 | 0.019 | 2.02         |

**Table S1** Bayesian integration (BI) requires more phylogenetic signal to recover the correct tree than maximum likelihood (ML). For each panel in Figure 1, we calculate the  $BL_{95}$ —the internal branch length at which the correct phylogeny is recovered from 95% of replicates—for BI and ML using logistic regression:  $1/(1 + e^{(x-c)s})$ , where  $x$  is the internal branch length;  $c$  is the internal length at which 50% accuracy is achieved, and  $s$  is the slope of the curve.
